# Supplementary material
Source: PubMed Central journal article supplement (PMC4790582)
Supplement: krol007732.w1_default.pdf [file krol007732.w1_default.pdf]

## Appendix 1: Example of a database search strategy

**Ovid MEDLINE(R) In-Process & Other Non-Indexed Citations and Ovid MEDLINE(R)  
<1946 to Present>; search date: July 4, 2012**

1 Physical examination/ and ((annual or GP or periodic or yearly or routine).ti. or ((primary adj2 (care or healthcare)) or primary health\$ or general practitioner? or general practice or family doctor? or family practice? or family physician?).ti,ab.) (2073)

2 (health check\$ or healthcheck\$ or annual physical? or annual medical or medical check\$ or primary care check\$ or wellness check\$ well care or wellcare or well woman or well visit?).ti. (806)

3 ((annual or periodic or regular or routine or yearly) and (check\$ or check-up? or health\$ exam\$ or health evaluation? or medical exam\$ or physical? exam\$ or wellness check\$ or GP visit? or physician? visit? or doctor? visit? or office visit?)).ti. (886)

4 ((annual or yearly) adj2 (medical? or physical?)).ti. (267)

5 ((annual or yearly) and visit?).ti. (28)

6 (preventive? and (care check\$ or checkup? or check-up? or visit? or exam\$ or family doctor? or GP or family physician? or general practitioner?)).ti. (769)

7 or/1-6 [Annual Checkups --Combine with filters only] (4074)

8 7 not (cannibis or alcohol\$ or abuse or narcotics or addiction?).ti. (4019)

9 Physical examination/ (27194)

10 (check-up? or checkup?).ti,ab. (8444)

11 (annual medical or yearly medical or annual physical).ab. (616)

12 ((annual or periodic or (primary adj2 (care or healthcare)) or primary health\$ or general practitioner? or general practice or GP or family doctor? or family practice? or family physician? or regular or routine or yearly) adj3 (healthcheck? or health\$ exam\$ or health evaluation? or medical exam\$ or office visit? or GP visit? or physical? exam\$ or wellness check\$)).ab. (3056)

13 ((annual or yearly) adj3 (physician? visit? or doctor? visit? or office visit?)).ab. (57)

14 "well care".ti,ab. (74)

15 (prevent\$ and (screen\$ or visit?)).ti. or (prevent\$ adj3 (screen\$ or visit?)).ab. (5502)

16 or/9-15 [Checkups general] (43592)

17 Mass screening/ (74782)

18 Multiphasic screening/ [ML] (1032)

19 ((community\$ or program? or multiphasic or multi-phasic or (primary adj2 care) or "office visit?" or GP or general practice or care or healthcare or routine or annual) adj2 screening).ab. (18736)

20 screening.ti. (90599)

21 or/17-20 [Screening] (139691)

22 Primary prevention/ [ML] (12669)

23 exp Preventive Health Services/ (388517)

24 Health promotion/ or Healthy People Programs/ (46825)

25 (prevention or preventive or preventative).ti. (141654)

26 Risk assessment/ (147905)

27 or/22-26 [Prevention/Risk Assessment ] (641516)

28 Risk factors/ (488641)

29 or/22-26,28 [Prevention/Risk Assessment/Risk Factors] (1054069)

30 exp Primary health care/ or Family practice/ or Physicians, family/ (132932)

31 ((family or general) adj (doctor? or practice? or practitioner? or physician\$)).ti. (36432)

32 (primary adj2 (care or health care or healthcare or medical care or patient care)).ti. (30347)

33 Community Health services/ or Community mental Health Services/ or Community Pharmacy Services/ or Mobile Health units/ or Community Health Centers/ or Community health nursing/ (67284)

34 community\$.ti. (79276)

35 or/30-34 [Primary/Community Care] (265615)

36 exp Aged/ [Elderly as group are unique whereas Adult is often not mentioned in indexing] (2111749)

37 (exp Cardiovascular Diseases/ or exp Digestive System Diseases/ or exp Endocrine System Diseases/ or exp Musculoskeletal Diseases/ or exp Lung Diseases, Obstructive/) and (pc or di).fs. (1042974)

38 disease?.hw. and (pc or di).fs. (773829)

- 39 (diabet\$ or cardio\$ or heart or disease or copd).ti. (1104250)
- 40 or/37-39 [Diseases--selected] (2326288)
- 41 (randomized controlled trial or controlled clinical trial).pt. or randomized.ab. or placebo.ab. or clinical trials as topic.sh. or randomly.ab. or trial.ti. (792755)
- 42 exp animals/ not humans.sh. (3736637)
- 43 "comment on".cm. or systematic review.ti. or literature review.ti. or editorial.pt. or letter.pt. or meta-analysis.pt. or news.pt. or review.pt. [to exclude irrelevant publication types] (3035036)
- 44 41 not (or/42-43) [Cochrane RCT Filter 6.4.d Sens/Precision Maximizing] (604530)
- 45 17 and (or/26,28) [Screening & Risk Factors/Assessment] (13587)
- 46 intervention?.ti. or (intervention? adj6 (clinician? or collaborat\$ or community or complex or DESIGN\$ or doctor? or educational or family doctor? or family physician? or family practitioner? or financial or GP or general practice? or hospital? or impact? or improv\$ or individuali?e? or individuali?ing or interdisciplin\$ or multicomponent or multi-component or multidisciplin\$ or multi-disciplin\$ or multifacet\$ or multi-facet\$ or multimodal\$ or multi-modal\$ or personali?e? or personali?ing or pharmacies or pharmacist? or pharmacy or physician? or practitioner? or prescrib\$ or prescription? or primary care or professional\$ or provider? or regulatory or regulatory or tailor\$ or target\$ or team\$ or usual care)).ab. (129705)
- 47 (collaborativ\$ or collaboration? or tailored or personali?ed).ti,ab. [added v2.0] (88248)
- 48 (exp hospitals/ or exp Hospitalization/ or exp Patients/ or exp Nurses/ or exp Nursing/) and (study.ti. or evaluation studies as topic/) [changed for v2.0 based on analysis of Mesh found on CBA & ITS not found by Filter 1.6] (33815)
- 49 demonstration project?.ti,ab. (1765)
- 50 (pre-post or "pre test\$" or pretest\$ or posttest\$ or "post test\$" or (pre adj5 post)).ti,ab. (53471)
- 51 (pre-workshop or post-workshop or (before adj3 workshop) or (after adj3 workshop)).ti,ab. (482)
- 52 trial.ti. or ((study adj3 aim?) or "our study").ab. (505273)
- 53 (before adj10 (after or during)).ti,ab. (318191)
- 54 ("quasi-experiment\$" or quasiexperiment\$ or "quasi random\$" or quasirandom\$ or "quasi control\$" or quasicontrol\$ or ((quasi\$ or experimental) adj3 (method\$ or study or trial or design\$))).ti,ab,hw. [ML] (88695)
- 55 ("time series" adj2 interrupt\$).ti,ab,hw. [ML] (720)

56 (time points adj3 (over or multiple or three or four or five or six or seven or eight or nine or ten or eleven or twelve or month\$ or hour? or day? or "more than")).ab. (7030)

57 pilot.ti. (32625)

58 Pilot projects/ [ML] (71559)

59 (clinical trial or multicenter study).pt. [ML removed RCT--redundant v2.0] (569629)

60 (multicentre or multicenter or multi-centre or multi-center).ti. (24273)

61 random\$.ti,ab. or controlled.ti. (643784)

62 (control adj3 (area or cohort? or compar? or condition or group? or intervention? or participant? or study)).ab. not (controlled clinical trial or randomized controlled trial).pt. [ML remove DESIGN changed truncation on Compare] (283159)

63 "comment on".cm. or systematic review.ti. or literature review.ti. or editorial.pt. or letter.pt. or meta-analysis.pt. or news.pt. or review.pt. [to exclude irrelevant publication types] (3035036)

64 exp animals/ not humans.sh. [ML] (3736637)

65 \*experimental design/ or \*pilot study/ or quasi experimental study/ [EM] (18154)

66 ("quasi-experiment\$" or quasiexperiment\$ or "quasi random\$" or quasirandom\$ or "quasi control\$" or quasicontrol\$ or ((quasi\$ or experimental) adj3 (method\$ or study or trial or design\$))).ti,ab. [EM] (88695)

67 ("time series" adj2 interrupt\$).ti,ab. [EM] (720)

68 (animal/ or animal.hw.) not ((animal/ or animal?.kw,hw.) and (human/ or human?.hw,kw.)) [EM] (3640992)

69 (book or letter).pt. [EM] (768605)

70 (or/46-53,56-57,60-62,65-67) not (or/68-69) [EPOC Methods Filter EM 2.0] (1564756)

71 (or/46-62) not (or/63-64) [EPOC Methods Filter ML 2.0] (1712551)

72 16 and 35 [Checkups (general) & Primary Care/Community Care] (3163)

73 16 and (or/21,27,40) [Checkup(general) & Screening/Prevention/Disease pc] (20424)

74 7 and 71 [Annual Checkups and EPOC Filter] (502)

75 7 and 44 [Annual Checkups and RCT Filter] (167)

76 16 and 35 and 44 [Checkups (general) & Primary/Community Care RCT Filter] (258)

77 16 and 35 and 71 [Checkups (general) & Primary/Community Care EPOC Filter] (774)  
78 (or/17-18) and (or/26,28) [Screening & Risk Factors/Assessment] (13635)  
79 74 not 75 [Unique Annual Checkups EPOC Filter] (341)  
80 16 and (or/21,27,40) and 44 [Checkup(general) & Screening/Prev/Disease pc & RCT] (984)  
81 (or/17-18) and (or/26,28) and 44 [Screening & Risk Factors/Assessment & RCT] (775)  
82 or/75-76,80-81 [RCT Results] (1842)  
83 (or/74,77,79) not 82 [EPOC Results] (738)  
84 (2011\$ or "2012" or 201012\$).ed. [Entry Date Limit Dec 2010; 2011- July 4, 2012] (1078390)  
85 82 and 84 [RCT Results limited by Entry Date] (173)  
86 83 and 84 [EPOC Results limited by Entry Date] (60)  
87 limit 82 to yr="2011-current" [RCT Results limited by year] (189)  
88 limit 83 to yr="2011-Current" [EPOC Results limited by year] (72)  
89 85 or 87 [RCT Results Dec.2010- Jul.2012] (249)  
90 86 or 88 [EPOC Results Dec.2010-Jul.2012] (91)
